# Supplementary material for: Predictable Phenotypes of Antibiotic Resistance Mutations
Source: PubMed Central journal article supplement (PMC5954217; doi:10.1128/mbio.00770-18), 2018-05-15

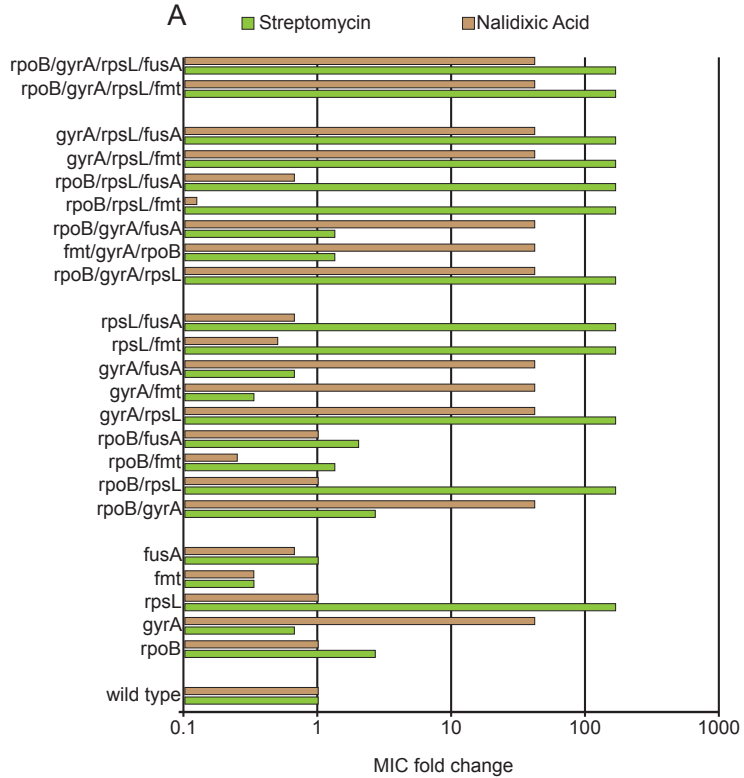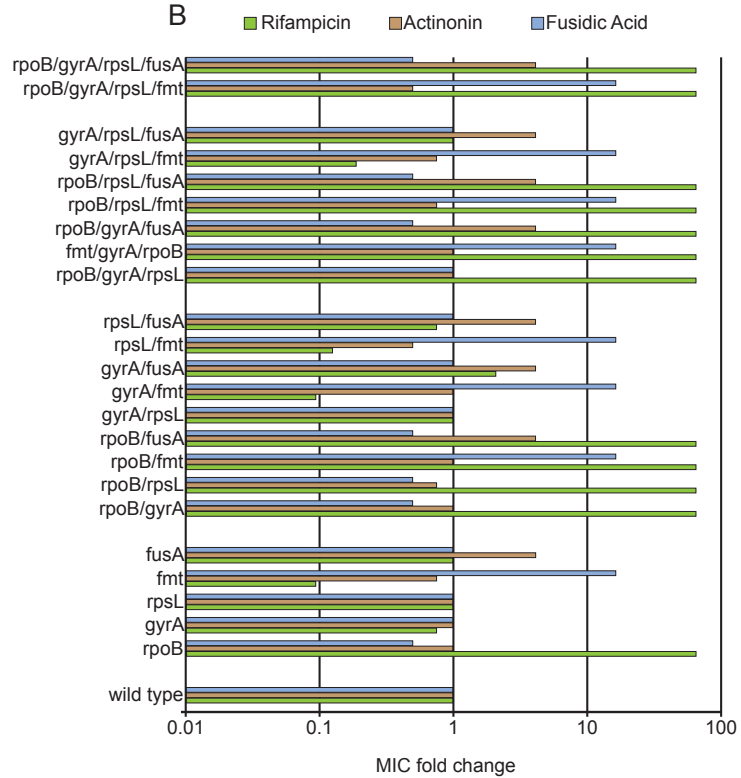

Supplement: mbo003183881sf2.pdf [file mbo003183881sf2.pdf]
